# Supplementary material for: Regional Differences in the Accumulation of SNPs on the Male-Specific Portion of the Human Y Chromosome Replicate Autosomal Patterns: Implications for Genetic Dating
Source: PubMed Central journal article supplement (PMC4520482; doi:10.1371/journal.pone.0134646), 2015-07-30

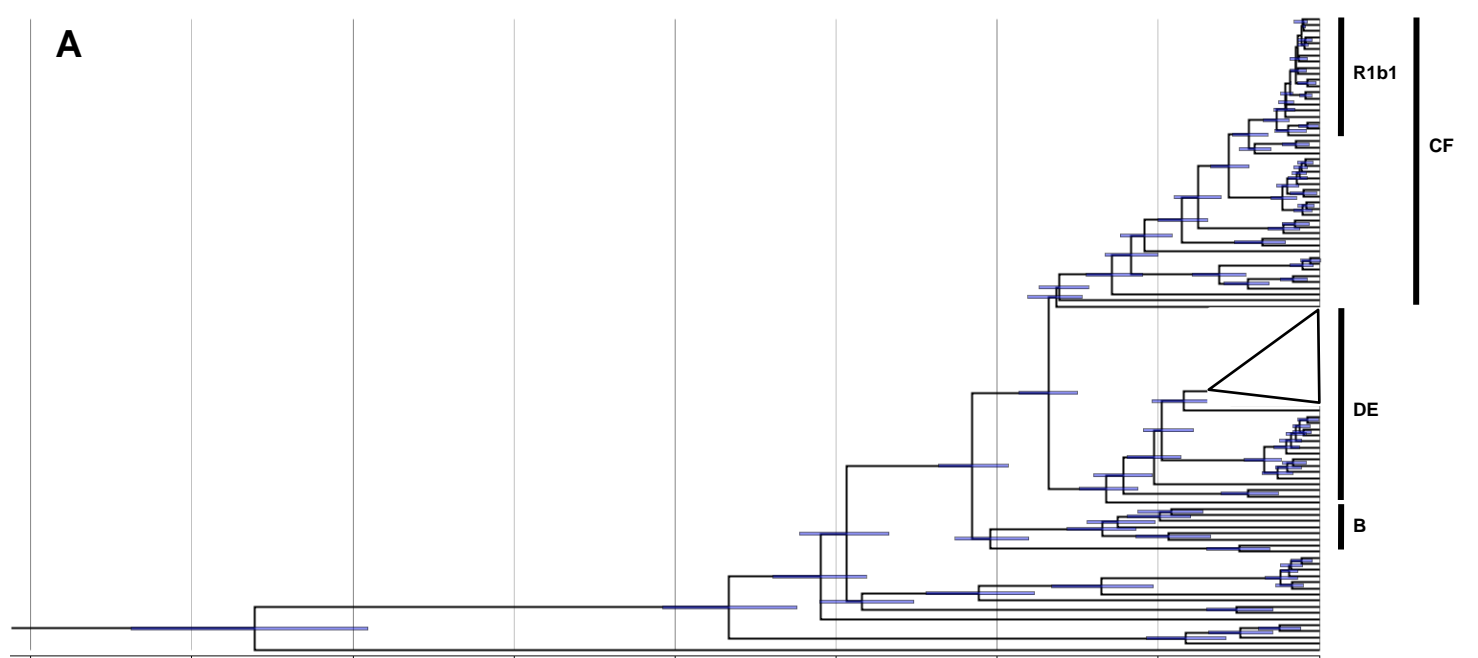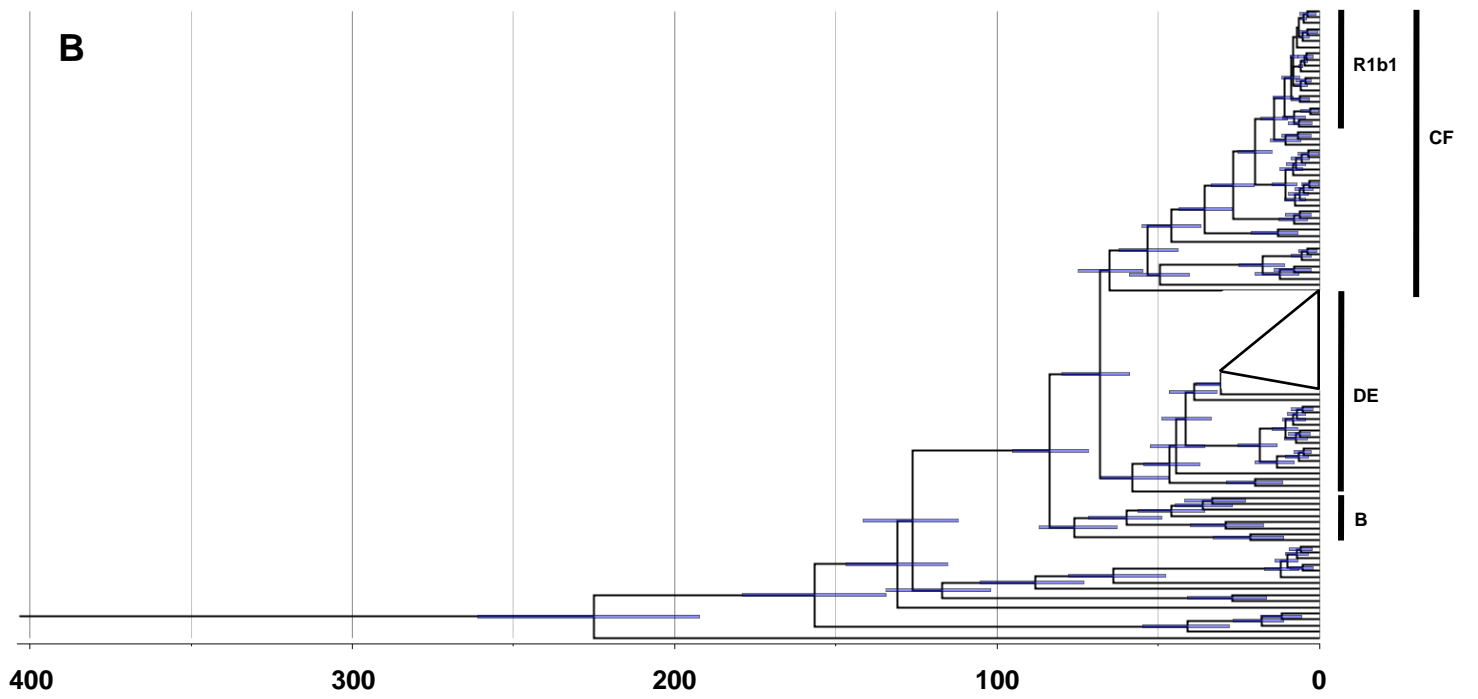

Supplement: pone.0134646.s001.pdf [file pone.0134646.s001.pdf]
